# Supplementary material
Source: publisher site journal article supplement (https://www.dovepress.com/article/supplementary_file/577514/577514%20Revised%20Supplementary%20Material.docx)
Supplement: Supplementary file 1 [file 577514%20Revised%20Supplementary%20Material.docx]

| Risk Factors | Points |
| --- | --- |
| Advanced glaucoma | 2 |
| Short eye (AC < 2.5 mm; or AL < 20 mm) | 2 |
| Dense corneal scarring | 4 |
| Dense Cataract/no fundus view | 4 |
| Small pupil/synechia | 3 |
| Pseudoexfoliation/zonular weakness | 2 |
| Floppy Iris (tamsulosin) | 2 |
| Posterior polar cataract | 2 |
| Hypotony (< 6 mmHg) | 2 |
| Age > 90 (or < 50) | 2 |
| Axial length > 28 mm | 3 |
| Previous vitrectomy | 3 |
| Capsule rupture at the fellow eye | 5 |
| Only eye | 5 |
| Patient positioning difficulties* | 2 |
| Tremor* | 2 |
| Claustrophobia* | 2 |
| Deafness/language difficulties* | 2 |

**Table S1.** Overview of risk factors and their assigned weighting in the TCS for preoperative assessment. Adapted from Kaiser et al.14

Factors marked with an asterisk (*) apply only under local anesthesia. (AC, anterior chamber; AL, axial length)
